# Supplementary figures and images for: Break-seq reveals hydroxyurea-induced chromosome fragility as a result of unscheduled conflict between DNA replication and transcription
Source: PubMed Central journal article supplement — Genome Res. 2015 Mar;25(3):402–12. doi: 10.1101/gr.180497.114 (PMC4352882; doi:10.1101/gr.180497.114), 2015-03

Figure S1

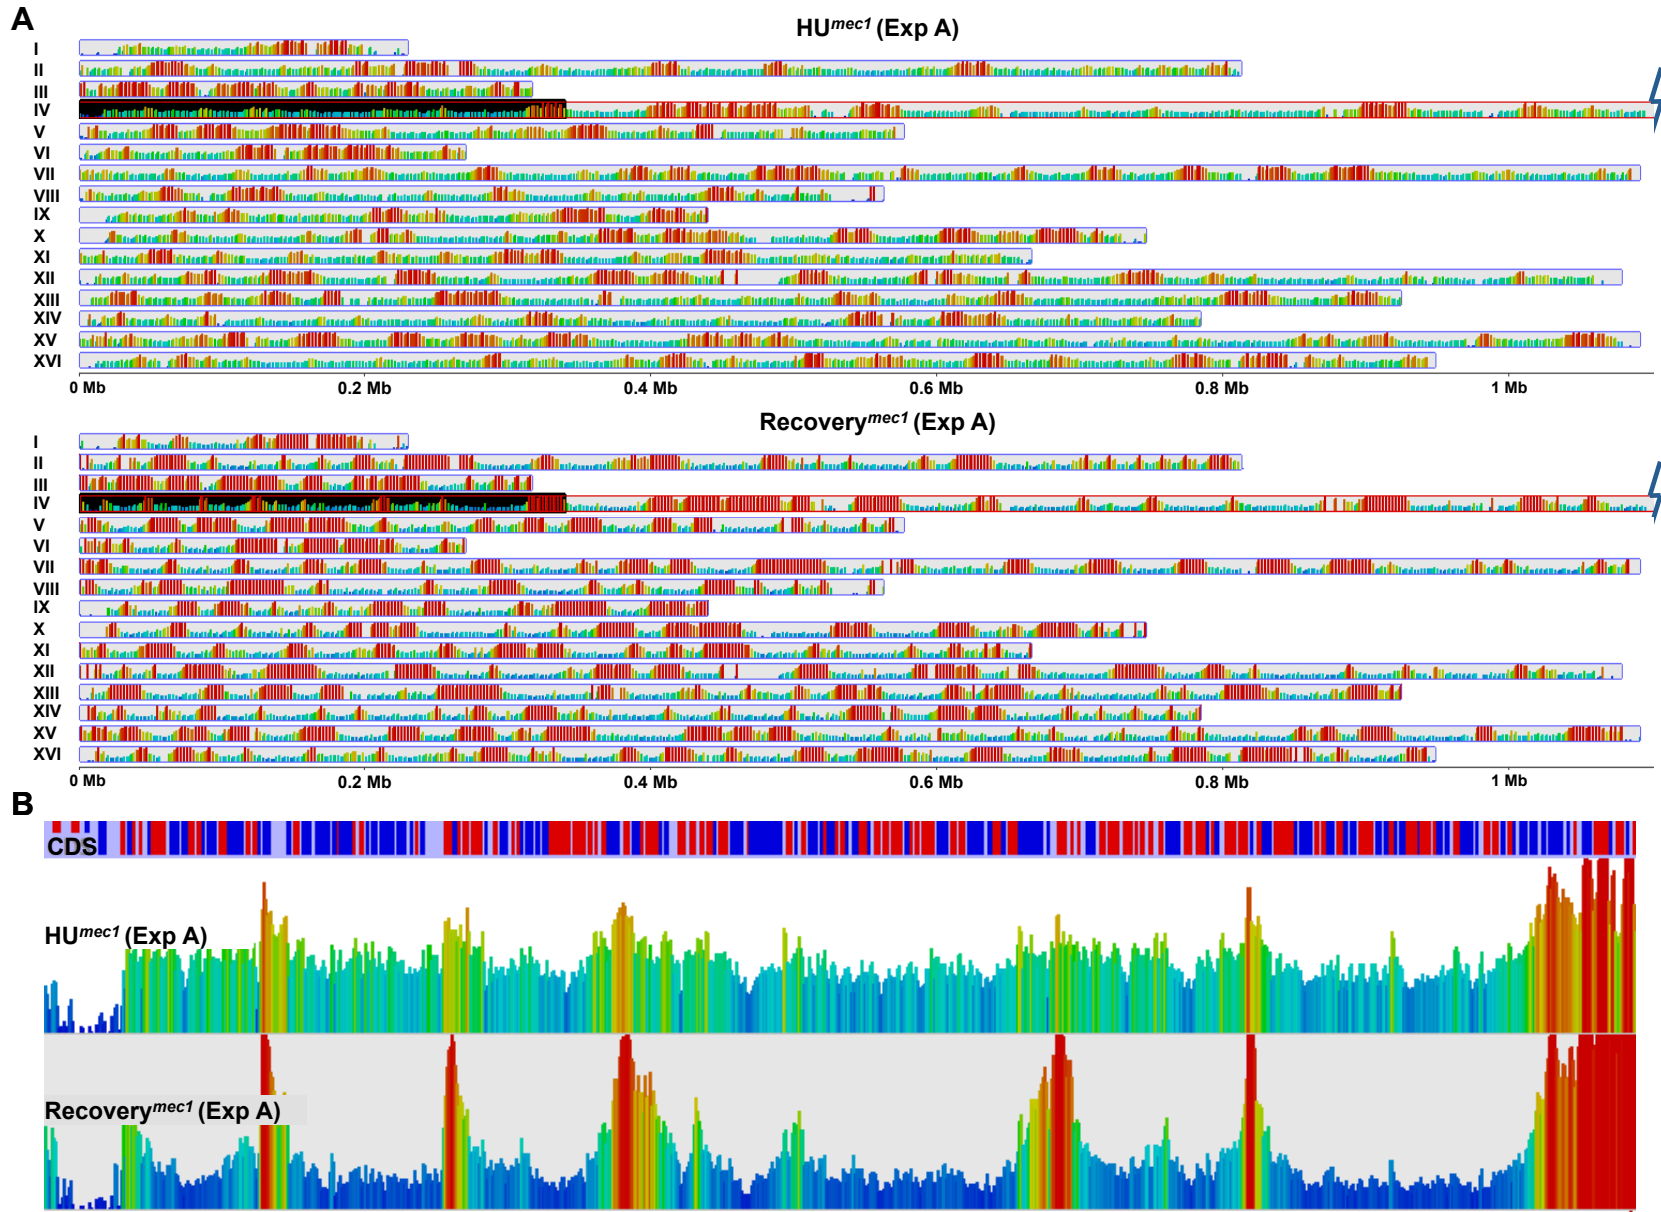

**Figure S2**

**A**

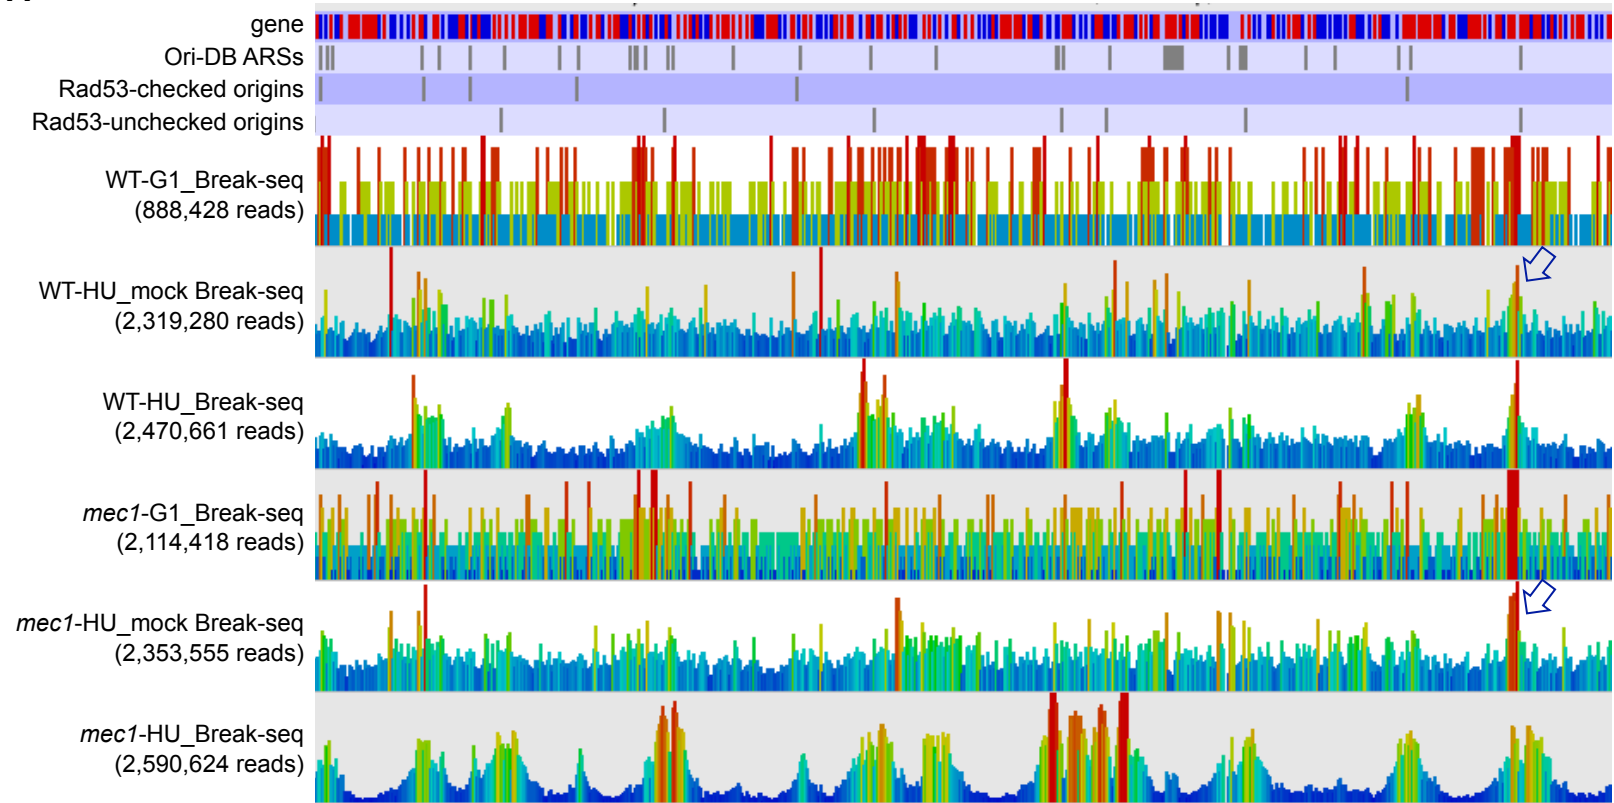

**B**

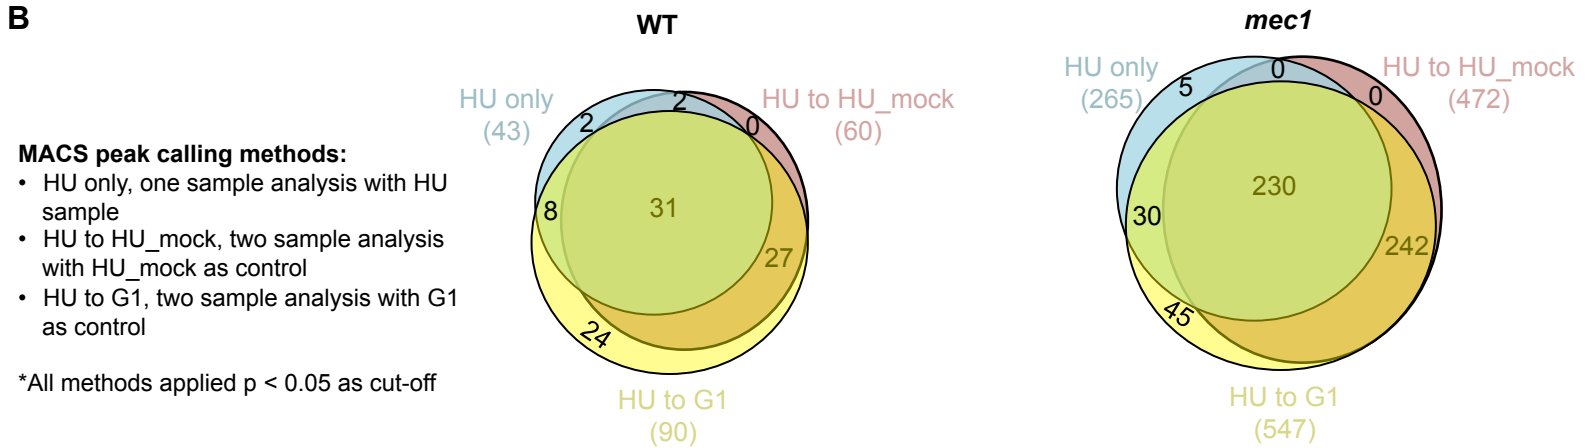

**Figure S3**

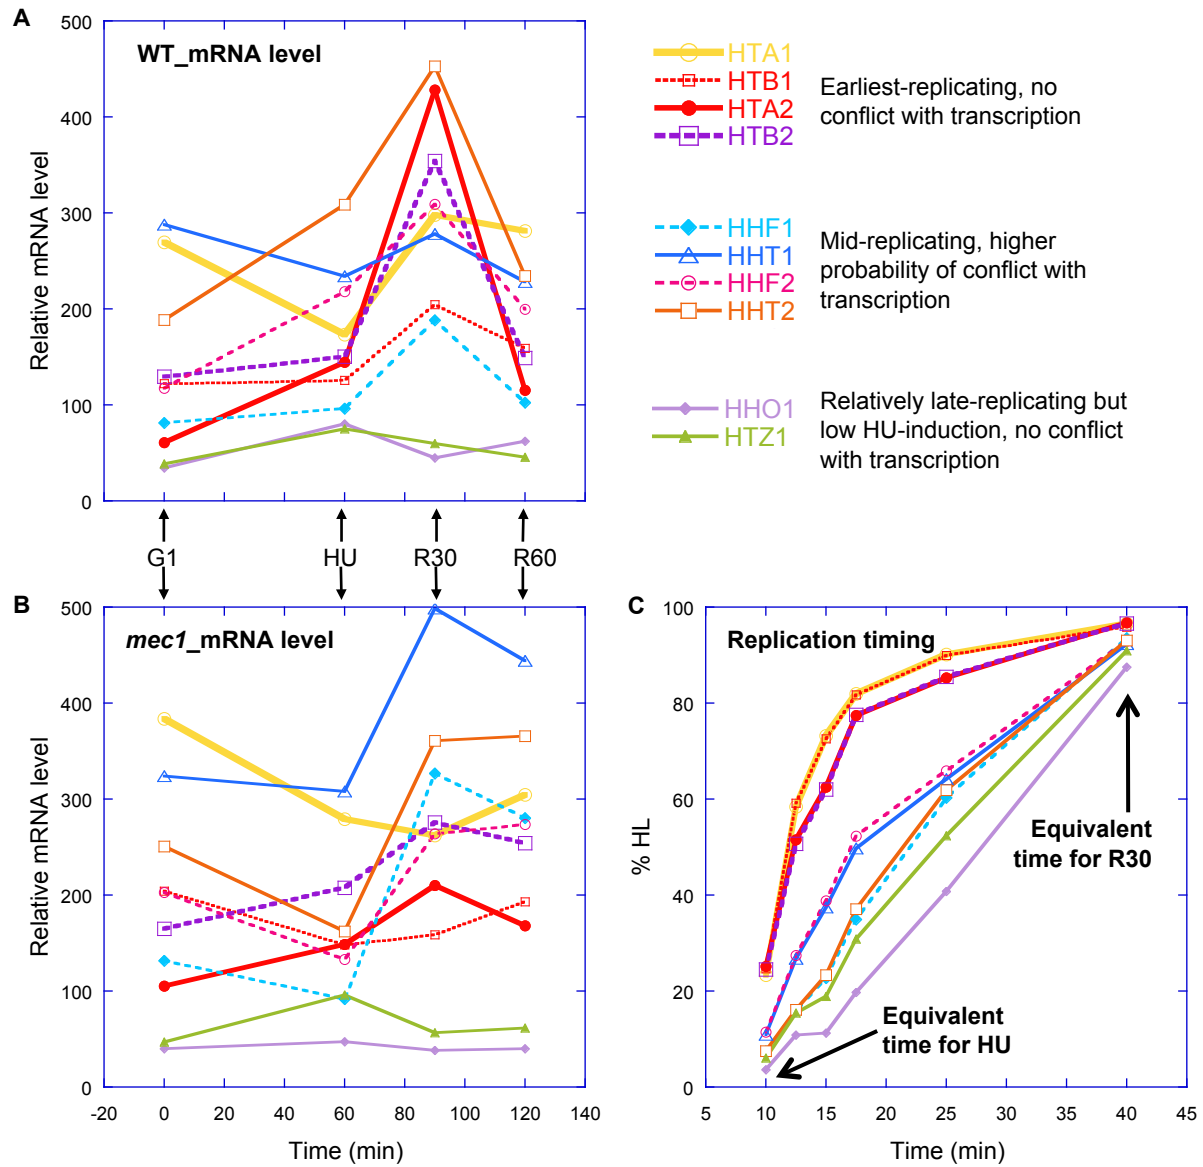

Supplement: supp_gr.180497.114_Supp_Figs.pdf [file supp_gr.180497.114_Supp_Figs.pdf]
